# Supplementary material
Source: publisher figshare collection journal article supplement (https://rs.figshare.com/ndownloader/files/17811167)
Supplement: Supplementary file [file 17811167]

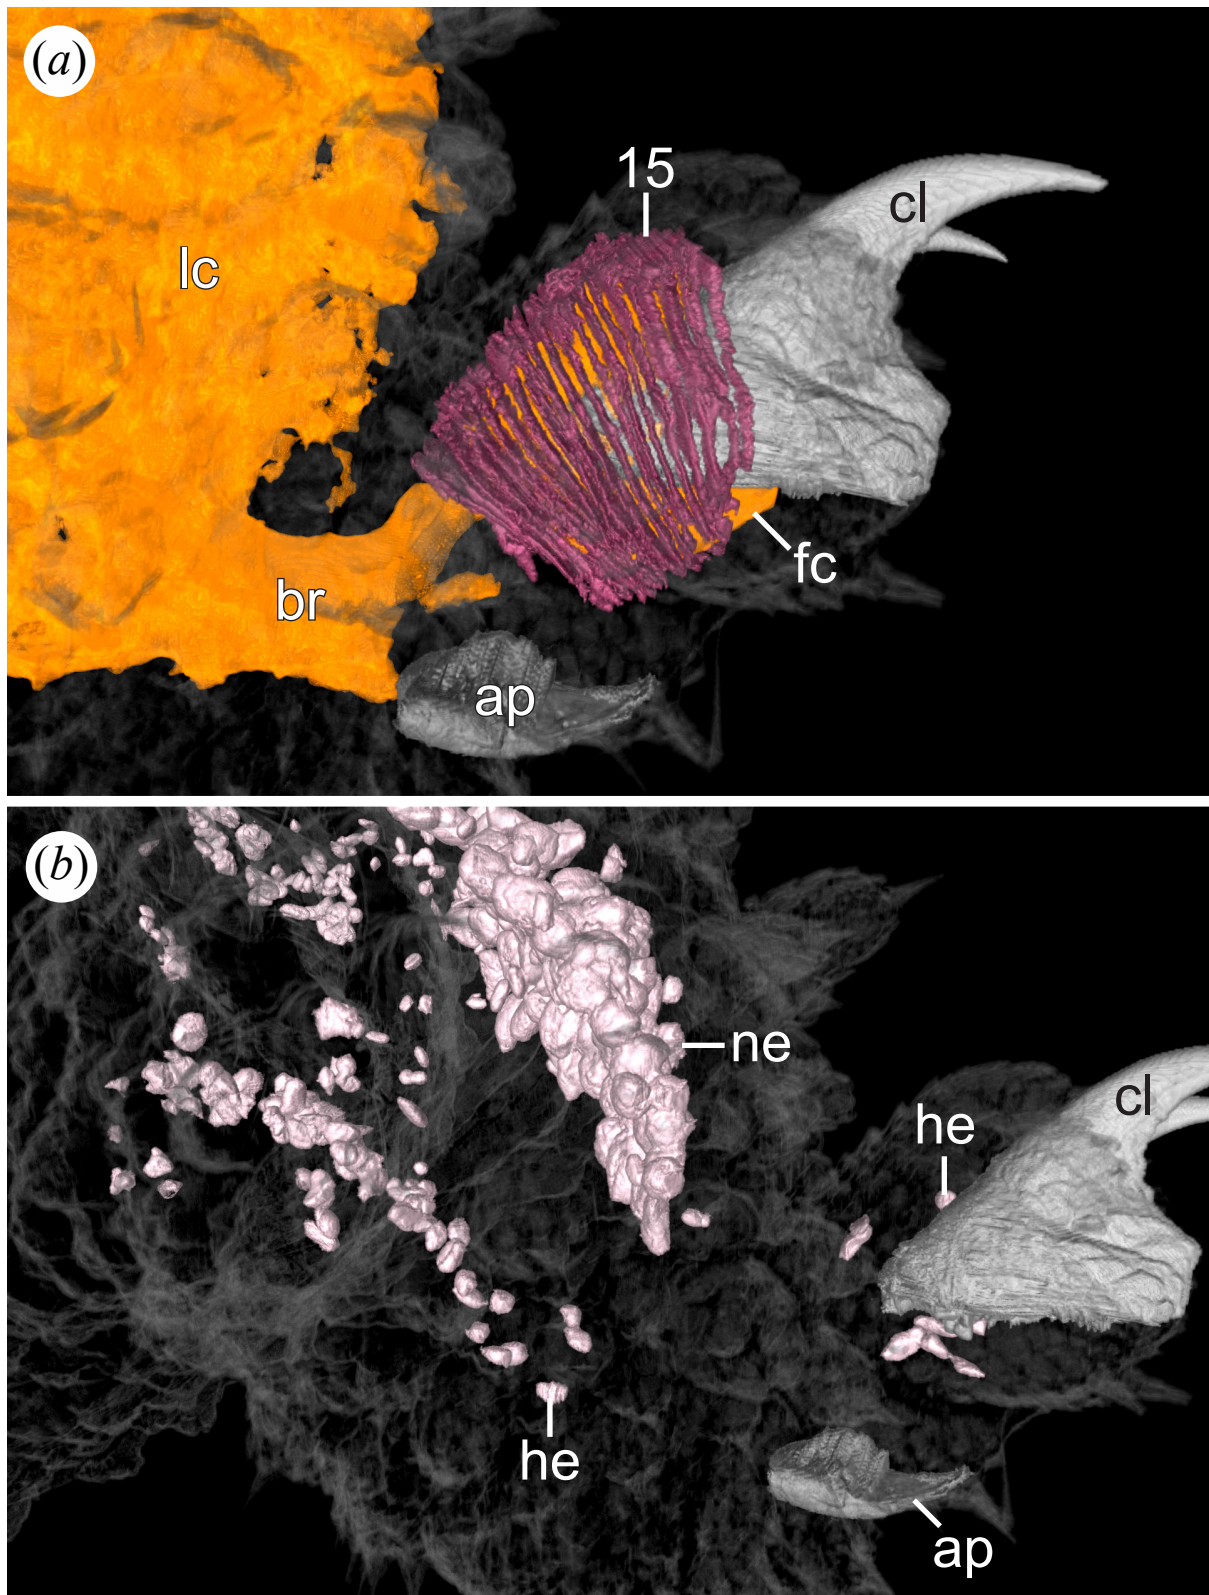

**Supplementary Figure 2. Musculature and haemolymph system of the foot in *E. rowelli*.** Volume rendering based on nanoCT data from left mid-trunk leg. Dorsal is up in both images. Body surface is semi-transparent. (a) Detail of the haemolymph channel within the foot bridge connecting the leg to the foot. The foot constrictor (#15, as in the main text) may regulate the hydrostatic pressure inside the foot. (b) Distribution of haemo- and nephrocytes within the leg and foot. Note that nephrocytes are larger and restricted to the leg cavity. Abbreviations: ap, foot apodeme; br, foot bridge; cl, claw; fc, foot cavity; he, haemocyte; lc, leg cavity; ne, nephrocyte.
